# Supplementary material
Source: Springer Nature journal article supplement (https://www.springermedizin.de/resource/supplementary/12888_2011_902_MOESM2_ESM.pdf/9478508)
Supplement: MOESM2 [file 9478508]

## Western Australian Data Linkage System

Including ER (from 1988), MHR (from 1966),  
hospital inpatient (from 1990), death data (from 1990)

### Linking ER and MHR data

MHCs (ER and MHR from 1988)/ Non-MHCs (a random sample of  
ER only from 1988)\*

Excluding MHR only  
and the rest of ER only

Linking cohort data with hospital inpatient and death data (from 1990)

Excluding died before 1  
Jan 1990 and dementia

MHCs

(n=139,208)

Non-MHCs

(n=294,180)
